# Supplementary material for: Prediction of WHO grade and methylation class of aggressive meningiomas: Extraction of diagnostic information from infrared spectroscopic data
Source: PubMed Central journal article supplement (PMC11245706; doi:10.1093/noajnl/vdae082), 2024-06-06
Supplement: vdae082_suppl_supplementary_figures.pdf [file vdae082_suppl_supplementary_figures.pdf]

## Supporting information

### Prediction of WHO grade and methylation class of aggressive meningiomas: Extraction of diagnostic information from infrared spectroscopic data

Roberta Galli, Franz Lehner, Sven Richter, Katrin Kirsche, Matthias Meinhardt, Tareq A. Juratli, Achim Temme, Matthias Kirsch, Rolf Warta, Christel Herold-Mende, Franz L. Ricklefs, Katrin Lamszus, Philipp Sievers, Felix Sahn, Ilker Y. Eyüpoglu, Ortrud Uckermann

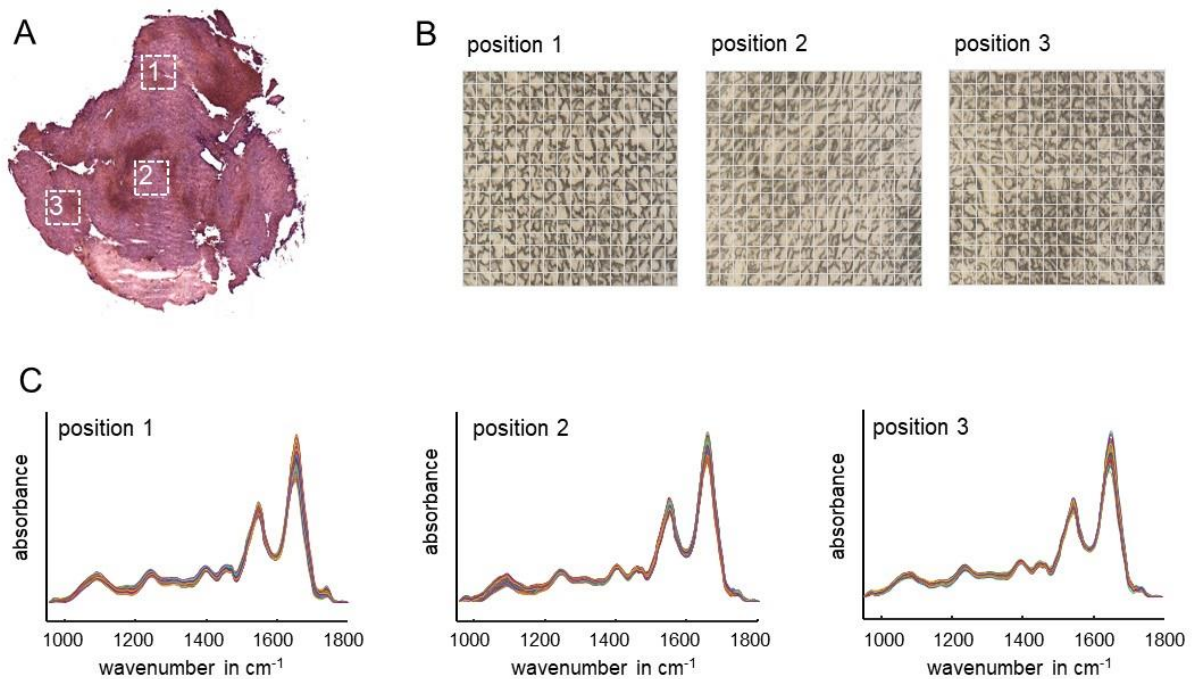

**Supporting Figure S1:** Acquisition of infrared spectra at three positions of the sample. **A:** Three positions were selected on HE stained tissue section **B:** Selected positions were identified on consecutive unstained tissue sections and infrared spectra were acquired in an area of 170x170  $\mu\text{m}$ . An array of 16x16 spectra was obtained after a 4x4 spatial binning procedure. **C:** Preprocessed IR spectra in the fingerprint region (950-1800  $\text{cm}^{-1}$ ) for each position (each  $n=256$ ). The example shows a meningioma WHO CNS grade 3, methylation class intermediate-A

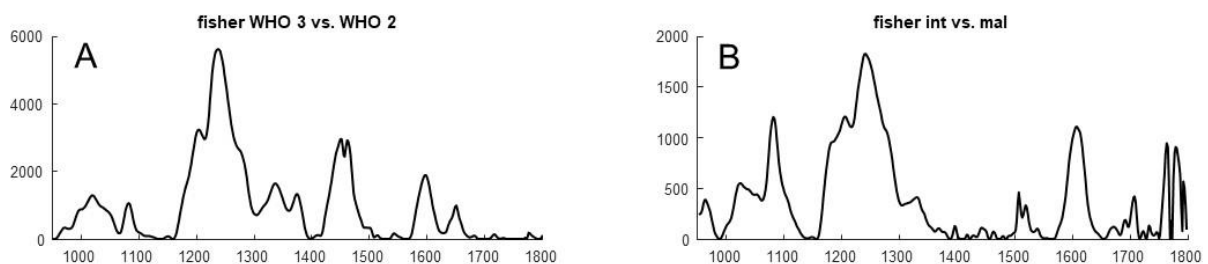

**Supporting Figure S2:** IR spectral signatures of the training set were analyzed. The Fisher coefficient was calculated to evaluate differences between WHO grade 2 versus WHO grade 3 (A) or methylation class intermediate versus malignant (B).

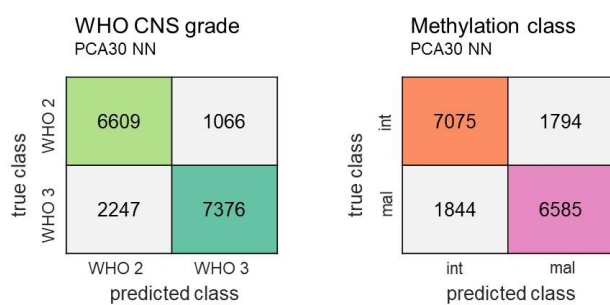

**Supporting Figure S3:** Confusion matrices for classification of spectra of the test set. The first 30 PCA were used followed by neural network classification

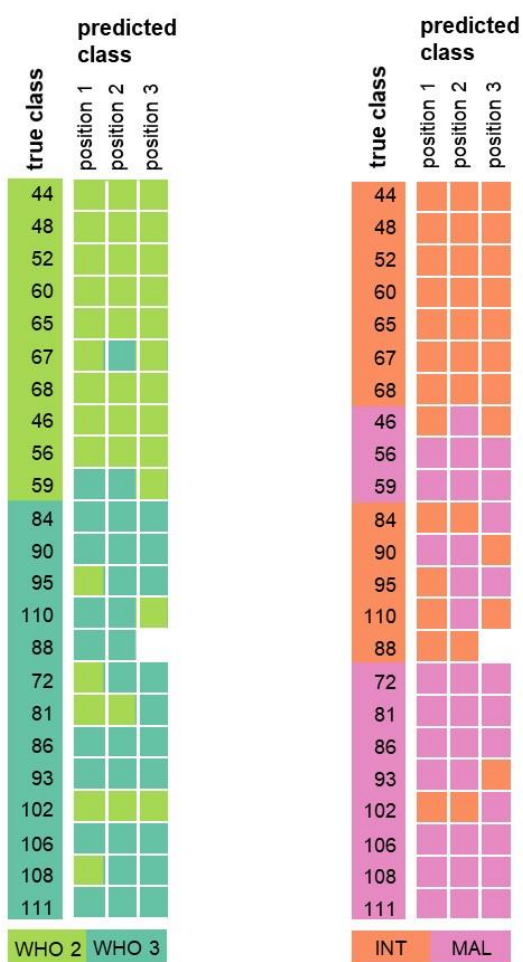

**Supporting Figure S4:** Classification result for the three measurement positions on each sample (for sample 88 only two positions were measured).
